# Supplementary material for: Plasmodium falciparum Heterochromatin Protein 1 Marks Genomic Loci Linked to Phenotypic Variation of Exported Virulence Factors
Source: PLOS journal article supplement (doi:10.1371/journal.ppat.1000569), 2009-09-03

**A**

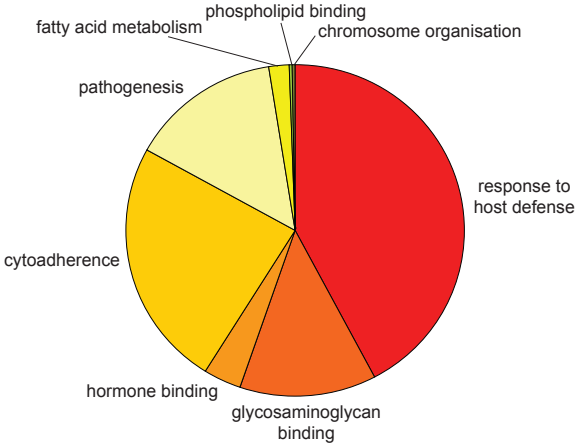

**B**

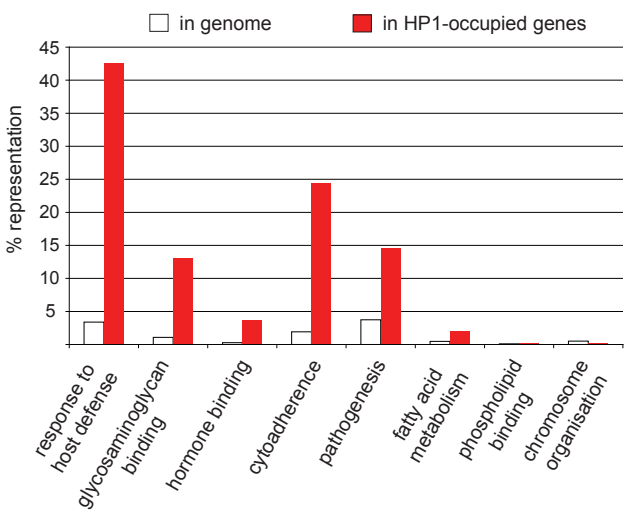

Supplement: S4 (10.1371/journal.ppat.1000569.s004) [file journal.ppat.1000569.s004]
