# Supplementary material for: Plasmodium falciparum Heterochromatin Protein 1 Marks Genomic Loci Linked to Phenotypic Variation of Exported Virulence Factors
Source: PLoS Pathog. 2009 Sep 4;5(9):e1000569. doi: 10.1371/journal.ppat.1000569 (PMC2731224; doi:10.1371/journal.ppat.1000569)
Supplement: Table S4 — Sequences and additional information of oligonucleotides used for qPCR. (0.04 MB XLS) [file ppat.1000569.s011.xls]

## Sheet: Sheet1
Supplementary table 4: Primers used in targeted ChIP experiments
Primer	Sequence (5'-3')	gene ID and name	location
PF13_0201 (trap) +1 F	gcaggtggaatagctggaggat	PF13_0201/Thrombospondin-related anonymous protein	coding region
PF13_0201 (trap) +1 R	tgttgctgctcctggtactacga
PFC0210c (csp) +1 F	ggctctgctaataaacctaaagacgaa	PFC0210c/circumsporozoite (CS) protein	coding region
PFC0210c (csp) +1 R	cactggaacatttttccattttacaaa
PF13_0247 (Pfs48/45) +1 F	ctgtattaacatcttttgatg	PF13_0247/transmission blocking target antigen precursor 48/45	coding region
PF13_0247 (Pfs48/45) +1 R	caagaaggaaaagaaaaagc
PF10_0303 (Pfs25) +1 F	gcttgtaaatgtaatcttgg	PF10_0303/25 kDa ookinete surface antigen precursor	coding region
PF10_0303 (Pfs25) +1 R	taacaggattgcttgtatc
PF08_0054 (hsp70) -1 F	aaacagaaggggcgaaatgg	PF08_0054/heat shock 70 kDa protein	promoter
PF08_0054 (hsp70) -1 R	gcaagttcaagggactaaaattcg
PF08_0054 (hsp70) +1 F	ggtattccacctgcaccaagaa	PF08_0054/heat shock 70 kDa protein	coding region
PF08_0054 (hsp70) +1 R	cagccgtaacgtttaagataccgt
PFI1475w (msp1) +1 F	acacacaacaacggtaac	PFI1475w/merozoite surface protein 1 precursor	coding region
PFI1475w (msp1) +1 R	ttgtcattactcttatgttc
PFI0265c (rhoph3) -1 F	gtgaataaatctaaatacagg	PFI0265c/RhopH3	promoter
PFI0265c (rhoph3) -1 R	taatacatccttagtgcag
PFI0265c (rhoph3) +1 F	catggaatgataagaagatc	PFI0265c/RhopH3	coding region
PFI0265c (rhoph3) +1 R	tggaatgtacctatattcg
MAL13P1.480 (hrp3) +1 F	atgtgcttgactttcgtg	MAL13P1.480/hrp3	coding region
MAL13P1.480 (hrp3) +1 R	ccgaatttaacaataacttg
PFB0100c (kahrp) +1 F	caggagcaagtactaatg	PFB0100c/knob associated histidine-rich protein	coding region
PFB0100c (kahrp) +1 R	gttgcttctttagaagtac
PFE0065w (sbp1) +1 F	ccacaactgatttggtac	PFE0065w/skeleton binding protein1 PfSBP1	coding region
PFE0065w (sbp1) +1 R	ttctacgttgccaacaag
TARE	catgtaaatttcgggcccca	Subtelomeric repeat region	between TARE2 and 3
TARE	ttgagaaggtgcttaaacccctc
PFL0935c (central UpsB) -1 F	cctaaatactatattttgagac	PFL0935c/central UpsB	promoter
PFL0935c (central UpsB) -1 R	cacatggaacacaactag
PF11_0007 (emp1)+1 F	gaggcttatgggaaaccaga	PF11_0007/PfEMP1 UpsB type	coding region
PF11_0007 (emp1)+1 R	aggcagtctttggcatcttt
PF10_0355 (emp, put) +1 F	gcaaaaaaatggtggacag	PF10_0355/PfEMP, putative	coding region
PF10_0355 (emp, put) +1 F	gtggtatatcatcaatgttac
PF07_0049 (emp1) +1 F	gttgagtctgcggcaataga	PF07_0049/PfEMP1 UpsC type	coding region
PF07_0049 (emp1) +1 R	ctggggtttgttcaacactg
PFL0030c (emp1) +1 F	gaagtgtgctcaattacgcata	PFL0030c/PfEMP1 UpsE type	coding region
PFL0030c (emp1) +1 R	atgtatcacacatagctccataaaag
PFD0630c (emp1) +1 F	actttctggtggggaatcag	PF07_0049/PfEMP1 UpsC type	coding region
PFD0630c (emp1) +1 R	ttcaccgccacttacttcag
PFI0080w (stevor) +1 F	tcataatgacccagaactt	PFI0080w/stevor	coding region
PFI0080w (stevor) +1 R	atttttttctactacttctc
PFC0050c (acs) +1 F	gttctttcaagtacatgtg	PFC0050c/acetyl-CoA synethetase	coding region
PFC0050c (acs) +1 R	ttccttatacaatcatagtg
PFD1205w (hyp) +1 F	gattaaaagggtagaatcg	PFD1205w/hypothetical integral membrane protein	coding region
PFD1205w (hyp) +1 R	aatctagtcatcctactag
MAL7P1.58 (mc-2tm_7.2) +1 F	tcattctattgattgcagc	MAL7P1.58 (PfMC-2TM_7.2)	coding region
MAL7P1.58 (mc-2tm_7.2) +1 R	gcaaacatatagatcataag
PFL1085w (hyp) +1 F	gaaagacgttctagcaag	PFL1085w/hypotetical protein	coding region
PFL1085w (hyp) +1 R	cttttgtaattcatatctcc
centro1 F	acacattggaaatttatgct		close to the centromer of chr1
centro1 R	gttatttaatgtataataatttccg
centro2 F	cgatataacaccatatgtg		close to the centromer of chr2
centro2 R	ccttcacaagtatgaaatg
centro3 F	cgacaaaaatcatacacatc		close to the centromer of chr3
centro3 R	gaatgtgaaaaactattatgg
centro4 F	gatacaaaactttatacacaac		close to the centromer of chr4
centro4 R	cattaagaatttcataatacatg
centro9 F	tatatattgtctttttattattttg		within the centromer of chr9
centro9 R	ctatttaataatacttagtttatg
centro11 F	tgaaatttatatattggattatag		within the centromer of chr11
centro11 R	atattgcaaaatgaaaaaatatag
centro12 F	aagtgtaggtaacatataaac		close to the centromer of chr12
centro12 R	catattatcctagaaaatctatc
centro14 F	cacaaaataaattttatacgtg		within the centromer of chr14
centro14 R	caaaactgataaatatgttttc
PFL1505c F	GTTTATAGAAACTACTACTTC	PFL1505c/hypothetical protein, conserved	coding region, centromer adjacent gene
PFL1505c R	CTAGCATTACAGTACTTATG
PFA0585w F	GAAATTAATGAAGCAAATACC	PFA0585w/hypothetical protein, conserved	coding region, centromer adjacent gene
PFA0585w R	GACTGGATATATAACTCATC
PFF0565c F	CATGAAATGGACAACAATG	PFF0565c/hypothetical protein, conserved	coding region, centromer adjacent gene
PFF0565c R	CATATTTGTCAGTGTTTCC
PFE0530w F	ACATTTAACAAATACAGCAG	PFE0530w/hypothetical protein, conserved	coding region, centromer adjacent gene
PFE0530w R	ACAAAATGGAATTTTCATGG
PF08_0118 F	CTAATGTGCATTATGAATAC	PF08_0118/hypothetical protein, conserved	coding region, centromer adjacent gene
PF08_0118 R	TTGTTATCATCACACAATTG
PFL1510c F	TAGTTGTTATTCATGATCAC	PFL1510c/hypothetical protein, conserved	coding region, centromer adjacent gene
PFL1510c R	CTTTGCATTCACTCATTAC
